# Supplementary material for: Pitfalls in Experimental Designs for Characterizing the Transcriptional, Methylational and Copy Number Changes of Oncogenes and Tumor Suppressor Genes
Source: PLoS One. 2013 Mar 5;8(3):e58163. doi: 10.1371/journal.pone.0058163 (PMC3589351; doi:10.1371/journal.pone.0058163)
Supplement: Table S1 — Directional agreement of the union of DE and DM genes across two datasets for each cancer type. (XLS) [file pone.0058163.s001.xls]

## Sheet: Supplementary Table S1
Supplementary Table S1. Directional agreement of the union of DE and DM genes across two datasets for each cancer type.
Cancer types	DE genes with 5% FDR	DM genes with 5% FDR
Lung	92.89% (7633)	97.44% (3402)
Gastric	91.20% (11927)	98.07% (4872)
Renal	85.88% (9671)	99.16% (4963)
Breast	83.15% (13723)	NA
Pancreatic	88.37% (16919)	NA
Ovarian	91.17% (13696)	NA
Colorectal	76.24% (14893)	97.77% (4170)
Note: For the two lists of DE and DM genes detected from two datasets for each cancer, the directional agreement rates were calculated as the number the union of DE and DM genes with consistent directions across the two datasets divided by the number of the union of DE and DM genes (in parenthesis); NA, not available.
